# Supplementary material for: Flocculation of livestock wastewater using cationic starch prepared from potato peels
Source: Royal Society of Chemistry journal article supplement (doi:10.1039/d2ew00794k), 2023-01-01
Supplement: d2ew00794k1.pdf [file d2ew00794k1.pdf]

Supplemental materials for:

## Flocculation of livestock wastewater using cationic starch prepared from potato peels

Noor Haleem,<sup>ab</sup> Augustina Osabutey,<sup>a</sup> Karlee Albert,<sup>c</sup> Cheng Zhang,<sup>\*d</sup> Kyungnan Min,<sup>e</sup>

Gary Anderson<sup>a</sup> and Xufei Yang<sup>\*a</sup>

<sup>a</sup> Department of Agricultural and Biosystems Engineering, South Dakota State University, Brookings, SD 57007, USA

<sup>b</sup> Institute of Environmental Sciences and Engineering (IESE), National University of Sciences and Technology (NUST), Islamabad 44000, Pakistan

<sup>c</sup> Department of Biology and Microbiology, South Dakota State University, Brookings, SD 57007, USA

<sup>d</sup> Department of Chemistry and Biochemistry, South Dakota State University, Brookings, SD 57007, USA

<sup>e</sup> Department of Civil and Environmental Engineering, South Dakota State University, Brookings, SD 57007, USA

\* Corresponding author; Tel: +1 605 688 5141; E-mails: [cheng.zhang@sdstate.edu](mailto:cheng.zhang@sdstate.edu); [xufei.yang@sdstate.edu](mailto:xufei.yang@sdstate.edu)

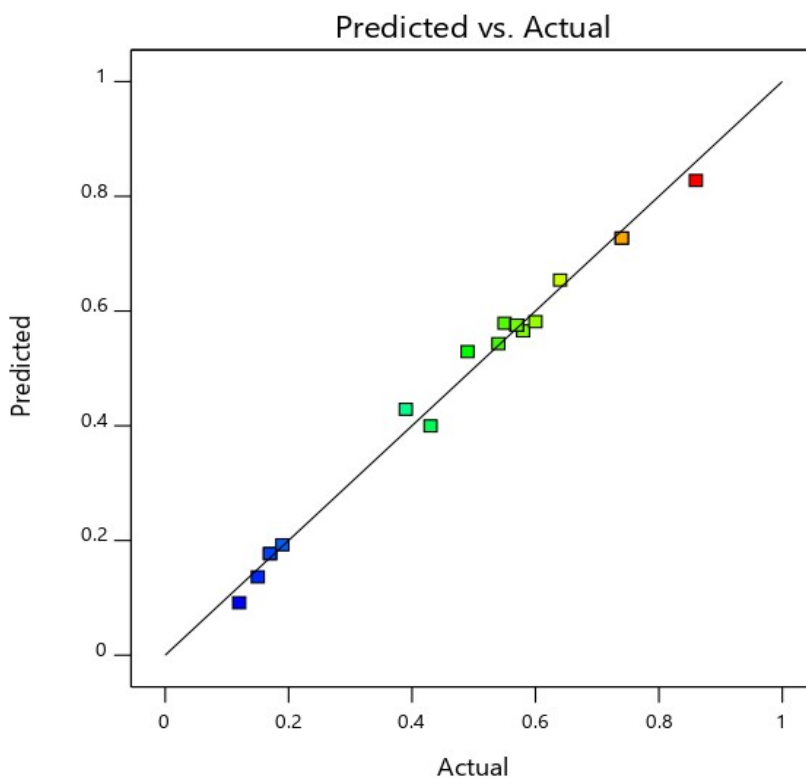

**Fig. S1.** Diagnostic plot of the quadratic model showing predicted responses versus actual responses.

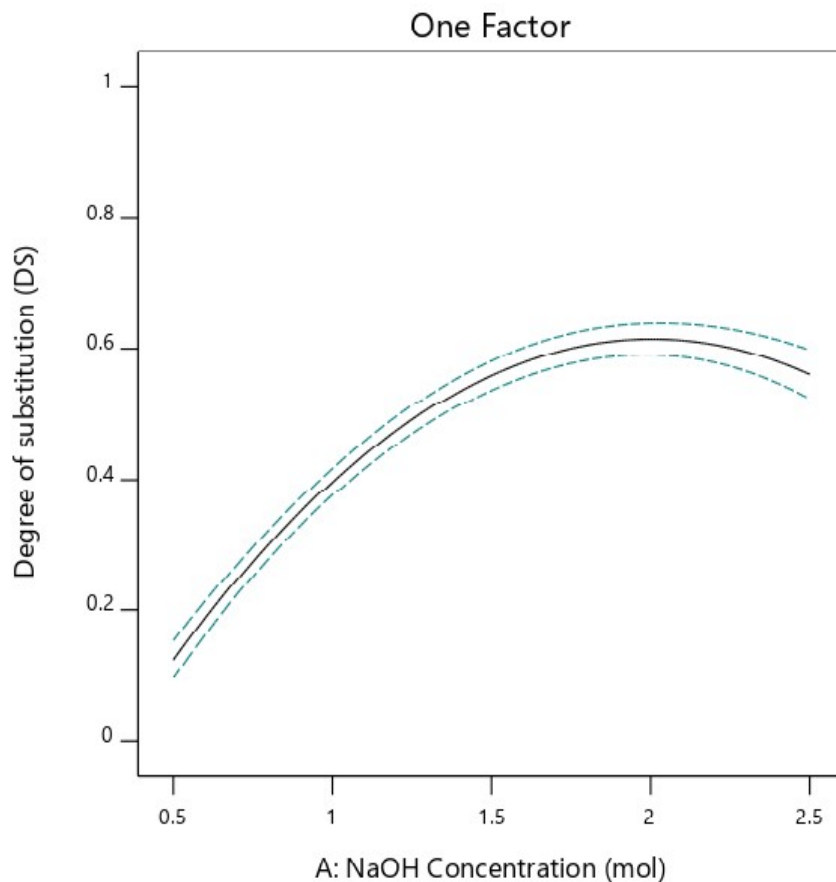

**Fig. S2.** Effect of NaOH concentrations on the degree of substitution (DS) of cationic starch. Note: The figure was created by the Design Expert software. The solid black line shows the predicted DS values at the reaction time of 3.5 h (average of 2-5 h) and the CHPTAC concentration of 0.088 M (average of 0.053-0.124M), and the blue dash lines represent the 95% confidence interval of the predicted DS.

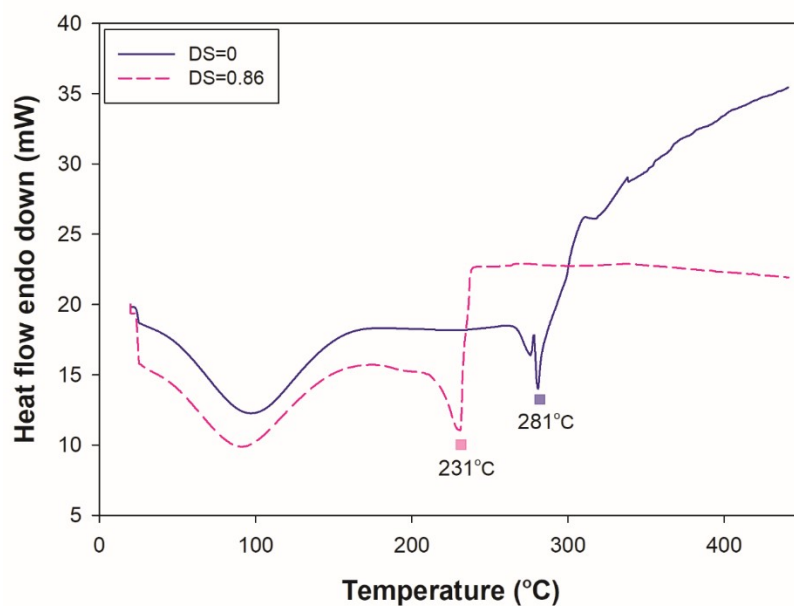

**Fig. S3.** Differential scanning calorimetry (DSC) thermograms of (a) raw starch (DS=0) extracted from potato peels (blue line) and (b) cationic starch with DS=0.86 (red dashed line).

**Table S1.** ANOVA for quadratic model for degree of substitution (DS) as a response of experimental variables.

| Source               | Sum of Squares | df | Mean Square | F-value | p-value <sup>a</sup> |
|----------------------|----------------|----|-------------|---------|----------------------|
| <b>Model</b>         | 0.8878         | 9  | 0.0986      | 121.01  | < 0.0001             |
| A-NaOH concentration | 0.4739         | 1  | 0.4739      | 581.43  | <u>&lt; 0.0001</u>   |
| B-Cationic reagent   | 0.0035         | 1  | 0.0035      | 4.35    | 0.0636               |
| C-Reaction time      | 0.0003         | 1  | 0.0003      | 0.3538  | 0.5652               |
| AB                   | 0.0000         | 1  | 0.0000      | 0.0189  | 0.8933               |
| AC                   | 5.74E-06       | 1  | 5.74E-06    | 0.0070  | 0.9348               |
| BC                   | 0.0425         | 1  | 0.0425      | 52.11   | <u>&lt; 0.0001</u>   |
| A <sup>2</sup>       | 0.1385         | 1  | 0.1385      | 169.96  | <u>&lt; 0.0001</u>   |
| B <sup>2</sup>       | 0.0006         | 1  | 0.0006      | 0.7345  | 0.4115               |
| C <sup>2</sup>       | 0.0147         | 1  | 0.0147      | 17.99   | <u>0.0017</u>        |
| <b>Residual</b>      | 0.0082         | 10 | 0.0008      |         |                      |
| Lack of Fit          | 0.0082         | 5  | 0.0016      |         |                      |
| Pure Error           | 0.0000         | 5  | 0.0000      |         |                      |
| Cor Total            | 0.8959         | 19 |             |         |                      |

<sup>a</sup> Variables with significant effects ( $p < 0.05$ ) were highlighted with underscore lines.
